# Supplementary material for: Decoding genome-wide GadEWX-transcriptional regulatory networks reveals multifaceted cellular responses to acid stress in Escherichia coli
Source: PubMed Central journal article supplement (PMC4918353; doi:10.1038/ncomms8970), 2015-08-10
Supplement: ncomms8970-s1.pdf [file ncomms8970-s1.pdf]

## Supplementary Figures

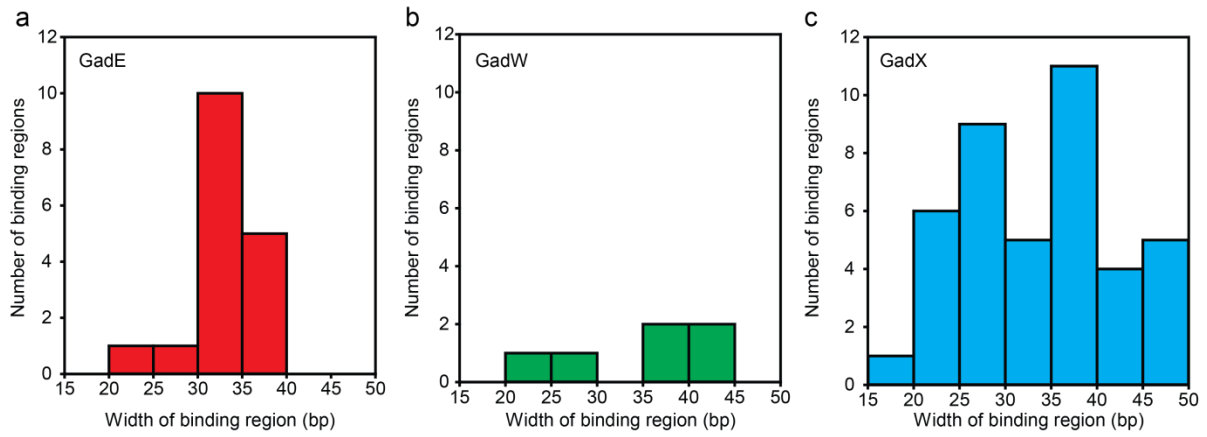

**Supplementary Figure 1. Width distribution of ChIP-exo binding sites.** The average binding widths for (a) GadE, (b) GadW, and (c) GadX are  $29 \pm 3.6$ ,  $30 \pm 7.6$ ,  $28.7 \pm 8.0$ , respectively.

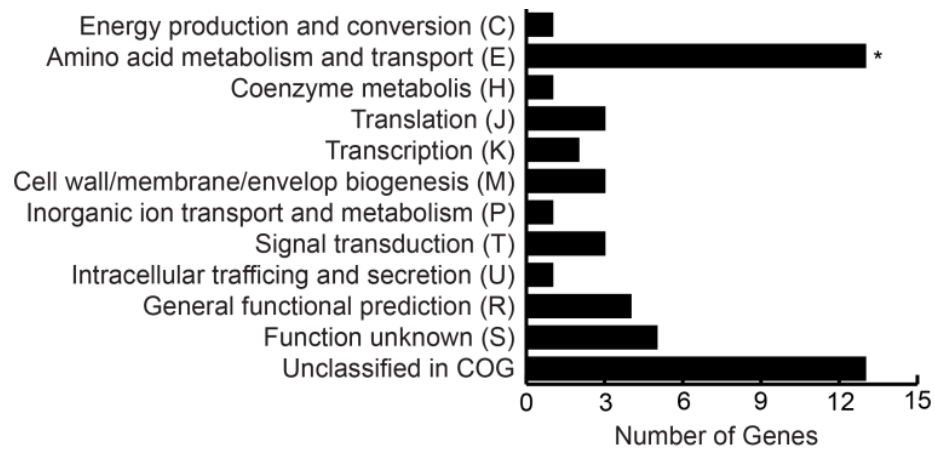

**Supplementary Figure 2. Functional classification of genes that belong to GadEWX regulons.** Clusters of Orthologous Groups (COG) categories were used to find the enriched functional groups. We performed one-tailed Fisher's exact test (Hypergeometric test), and  $P$ -value  $< 0.05$  was considered significant. The asterisk indicates Hypergeometric  $P$ -value  $< 0.05$ .

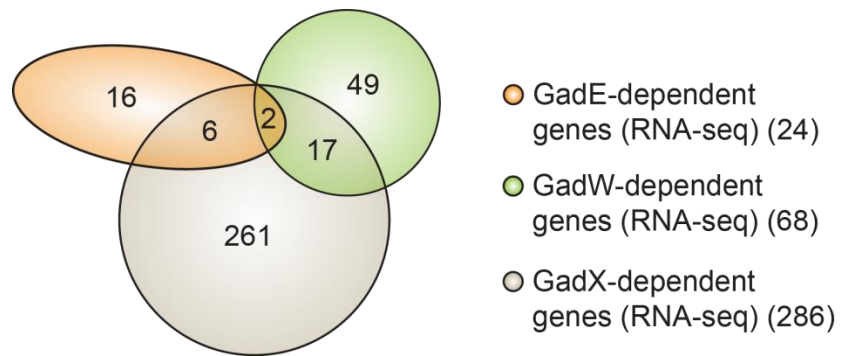

**Supplementary Figure 3. Overlap among GadE-, GadW-, and GadX-dependent transcriptome under acidic stress.** Transcription level was compared between wild-type and each deletion mutant to define dependent genes under acidic stress (pH 5.5).

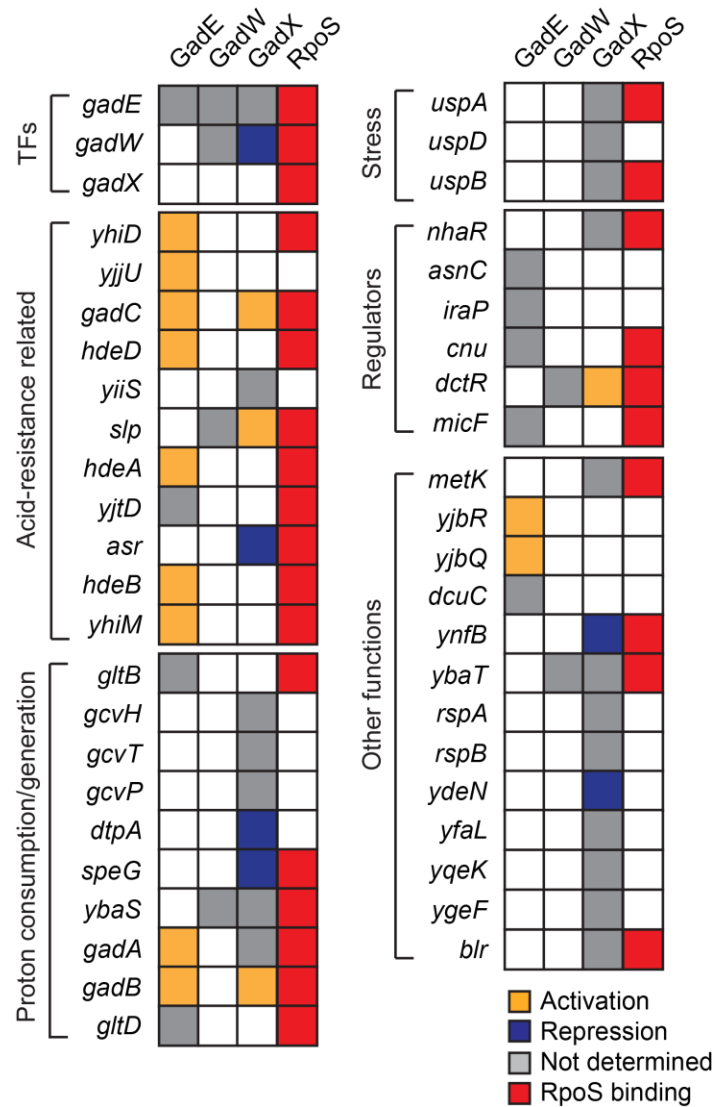

**Supplementary Figure 4. Regulatory causation in GadE, GadW, and GadX regulons and RpoS interaction.** Causal relationships between direct associations of transcription factors (GadE, GadW, and GadX) and the changes in transcript levels of genes. The binding events of RpoS under acid stress (pH 5.5) were also described.

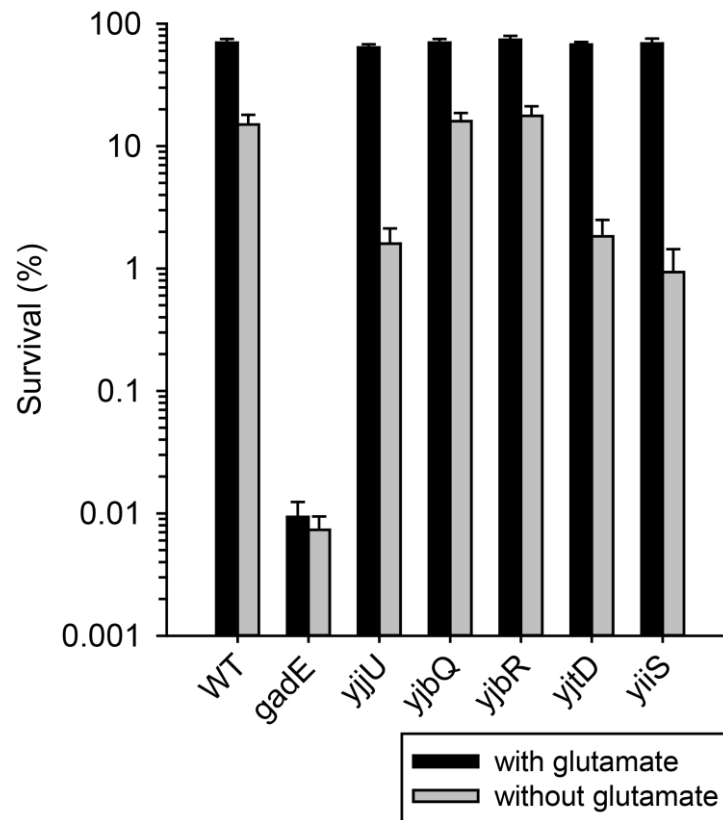

**Supplementary Figure 5. Acid resistance assays.** We tested acid resistance for knock-out strains of 5 different Y-genes whose functions are not yet described. They were not directly related to glutamate-dependent acid resistance such as GadE. However, three of them (*yjjU*, *yjtD*, and *yisS*) were related to general acid resistance. The acid resistance assays were performed triplicates. The means and standard deviations (n=3) are depicted. Detailed procedures are described in the method section.

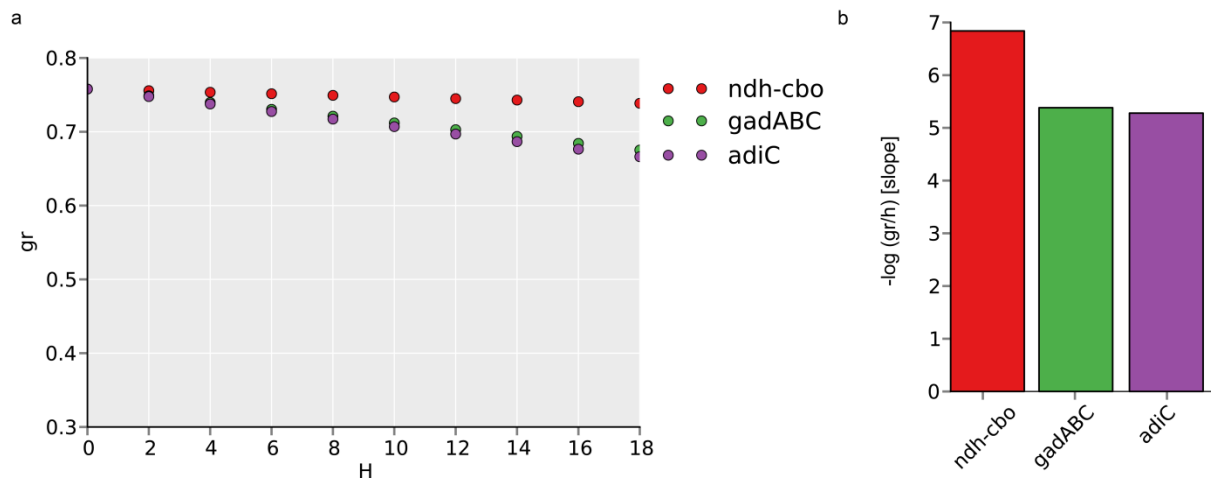

**Supplementary Figure 6. ME-simulation results upon acid stress.** From ME-model simulation, we predicted **(a)** changes of growth rate (gr) depending on the acid stress (H). **(b)** The slope ( $-\log(\text{gr}/\text{h})$ ) was calculated to compare the efficiency of the relief of acid stress for each system. The ndh-cbo complexes were more efficient than other two amino acid decarboxylase-antiporter pairs.

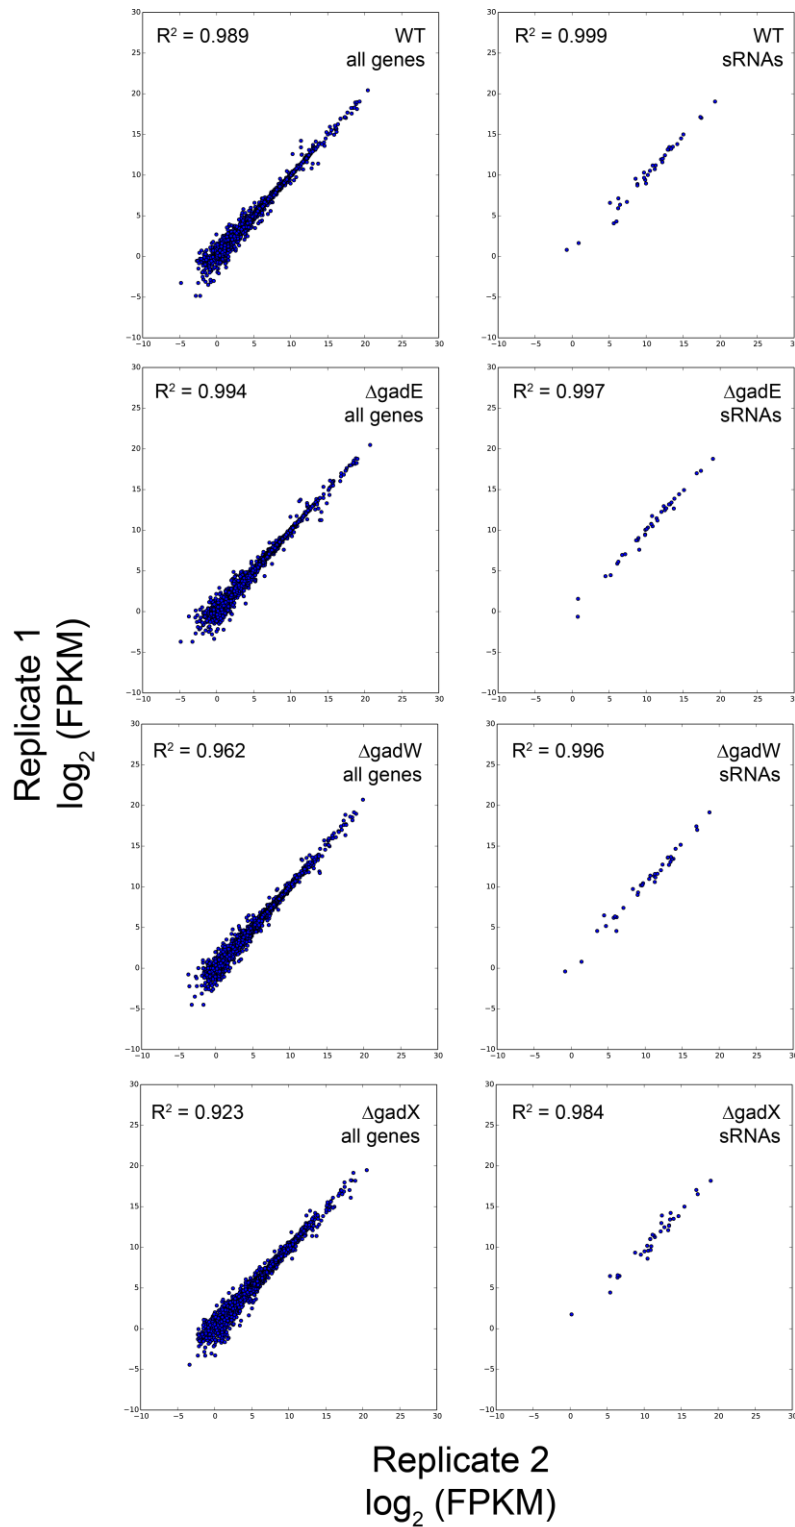

**Supplementary Figure 7. Reproducibility of RNA-seq data.**  $\log_2$ (FPKM) values of two biological replicates were compared for all genes and sRNAs for each strain.

## Supplementary Tables

Supplementary Table 1. GadE-associated regions identified by ChIP-exo analysis.

| Binding Sites | Transcription Unit | Peak | ChIP-exo Start | ChIP-exo End | Location   | Causal relationship upon K/O | Regulatory Mode | Distance to TSS | S/N ratio | RpoS involved? <sup>a</sup> |
|---------------|--------------------|------|----------------|--------------|------------|------------------------------|-----------------|-----------------|-----------|-----------------------------|
| 1             | <i>iraP</i>        | P1   | 400316         | 400345       | Upstream   | N                            | -               | -256.5          | 76.60     | No                          |
| 2             | <i>dcuC</i>        | P2   | 655216         | 655243       | Upstream   | N                            | -               | 76.5            | 1.43      | No                          |
| 3             | <i>gadBC</i>       | P3   | 1570144        | 1570175      | Upstream   | Y                            | Act             | -62.5           | 2.78      | Yes                         |
| 4             | <i>cnu</i>         | P4   | 1702759        | 1702787      | Upstream   | N                            | -               | -15             | 1.59      | Yes                         |
| 5             | <i>micF</i>        | P5   | 2311024        | 2311054      | Upstream   | N                            | -               | -67             | 15.21     | Yes                         |
| 6             | <i>yjjU</i>        | P6   | 2769762        | 2769784      | Downstream | N                            | -               | -               | 1.15      | -                           |
| 7             | <i>gltBD</i>       | P7   | 3352240        | 3352258      | Upstream   | N                            | -               | -284            | 1.20      | Yes                         |
| 8             | <i>yhiM</i>        | P8   | 3632675        | 3632700      | Upstream   | Y                            | Act             | -78.5           | 1.53      | Yes                         |
| 9             | <i>hdeAB-yhiD</i>  | P9   | 3654789        | 3654820      | Upstream   | Y                            | Act             | 9.5             | 25.63     | Yes                         |
| 10            | <i>hdeD</i>        | P10  | 3654915        | 3654943      | Upstream   | Y                            | Act             | -54             | 40.96     | Yes                         |
| 11            | <i>gadE</i>        | P11  | 3656193        | 3656227      | Upstream   | -                            | -               | -55             | 13.48     | Yes                         |
| 12            | <i>gadA</i>        | P12  | 3665681        | 3665709      | Upstream   | Y                            | Act             | -64             | 1.48      | Yes                         |
| 13            | <i>asnC</i>        | P13  | 3925018        | 3925047      | Upstream   | N                            | -               | 21.5            | 1.24      | No                          |
| 14            | <i>yjbQR</i>       | P14  | 4267976        | 4268006      | Upstream   | Y                            | Act             | -40             | 1.01      | No                          |
| 15            | <i>yjjU</i>        | P15  | 4610316        | 4610345      | Upstream   | Y                            | Act             | 186.5           | 1.09      | No                          |
| 16            | <i>yjtD</i>        | P16  | 4638752        | 4638780      | Upstream   | N                            | -               | -               | 2.49      | Yes                         |

<sup>a</sup> Red characters indicate novel RpoS bindings.



**Supplementary Table 2. GadW-associated regions identified by ChIP-exo analysis.**

| Binding Sites | Transcription Unit | Peak | ChIP-exo Start | ChIP-exo End | Location | Causal relationship upon K/O | Regulatory Mode | Distance to TSS | S/N ratio | RpoS Involved? <sup>a</sup> |
|---------------|--------------------|------|----------------|--------------|----------|------------------------------|-----------------|-----------------|-----------|-----------------------------|
| 1             | <i>ybaST</i>       | P1   | 510790         | 510823       | Upstream | N                            | -               | 11.5            | 13.36     | Yes                         |
| 2             | <i>slp-dctR</i>    | P2   | 3651968        | 3651984      | Upstream | N                            | -               | 17              | 5.87      | Yes                         |
| 3             | <i>gadE</i>        | P3   | 3655735        | 3655770      | Upstream | N                            | -               | -70.5           | 3.99      | Yes                         |
|               |                    | P4   | 3655819        | 3655843      | Upstream | N                            | -               | 8               | 4.53      |                             |
| 4             | <i>gadW</i>        | P5   | 3662857        | 3662888      | Upstream | N                            | -               | -68.5           | 14.26     | Yes                         |
|               |                    | P6   | 3662883        | 3662918      | Upstream | N                            | -               | -96.5           | 20.80     |                             |

<sup>a</sup> Red characters indicate novel RpoS bindings.

Supplementary Table 3. GadX-associated regions identified by ChIP-exo analysis.

| Binding Sites | Transcription Unit | Peak | ChIP-exo Start | ChIP-exo End | Location | Causal relationship upon K/O | Regulatory Mode | Distance to TSS | S/N ratio | RpoS Involved? <sup>a</sup> |
|---------------|--------------------|------|----------------|--------------|----------|------------------------------|-----------------|-----------------|-----------|-----------------------------|
| 1             | <i>nhaR</i>        | P1   | 18012          | 18042        | Upstream | N                            | -               | 2               | 102.70    | Yes                         |
| 2             | <i>yagN</i>        | P2   | 294529         | 294546       | Internal | N                            | -               | -               | 7.49      | -                           |
| 3             | <i>ybaST</i>       | P3   | 510790         | 510823       | Upstream | N                            | -               | 11.5            | 417.36    | Yes                         |
| 4             | <i>asnS</i>        | P4   | 987539         | 987552       | Internal | N                            | -               | -               | 6.23      | -                           |
|               |                    | P5   | 1570011        | 1570051      | Upstream |                              |                 | 66              | 50.10     |                             |
| 5             | <i>gadBC</i>       | P6   | 1570261        | 1570301      | Upstream | Y                            | Act             | -184            | 42.20     | Yes                         |
|               |                    | P7   | 1570302        | 1570342      | Upstream |                              |                 | -225            | 43.95     |                             |
|               |                    | P8   | 1570345        | 1570385      | Upstream |                              |                 | -268            | 41.97     |                             |
|               |                    | P9   | 1580632        | 1580662      | Upstream |                              |                 | -69             | 8.32      |                             |
| 6             | <i>ydeN</i>        | P10  | 1580799        | 1580824      | Upstream | Y                            | Rep             | -233.5          | 13.67     | No                          |
| 7             | <i>rspAB</i>       | P11  | 1653263        | 1653281      | Upstream | N                            | -               | 395             | 7.82      | No                          |
| 8             | <i>ynfB-speG</i>   | P12  | 1653697        | 1653730      | Upstream | Y                            | Rep             | -94.5           | 3.97      | Yes                         |
| 9             | <i>asr</i>         | P13  | 1669352        | 1669375      | Upstream | Y                            | Rep             | 473.5           | 1.83      | Yes                         |
| 10            | <i>blr</i>         | P14  | 1702520        | 1702552      | Upstream | N                            | -               | 0               | 8.70      | Yes                         |
| 11            | <i>dtpA</i>        | P15  | 1710534        | 1710554      | Upstream | Y                            | Rep             | -151            | 2.54      | No                          |
|               |                    | P16  | 2342146        | 2342173      | Upstream |                              |                 | -               | 7.84      |                             |
| 12            | <i>yfaL</i>        | P17  | 2342169        | 2342207      | Upstream | N                            | -               | -               | 8.54      | No                          |
| 13            | <i>yqeK/ygeF</i>   | P18  | 2988594        | 2988613      | Upstream | N                            | -               | -               | 23.57     | No                          |
| 14            | <i>ygeH</i>        | P19  | 2990931        | 2990949      | Internal | N                            | -               | -               | 7.45      | -                           |
|               |                    | P20  | 3048878        | 3048906      | Upstream |                              |                 | -98             | 8.66      |                             |
| 15            | <i>gcvTHP</i>      | P21  | 3048982        | 3049002      | Upstream | N                            | -               | -198            | 10.94     | No                          |
|               |                    | P22  | 3084478        | 3084504      | Upstream |                              |                 | -100            | 19.66     |                             |
| 16            | <i>metK</i>        | P23  | 3084574        | 3084607      | Upstream | N                            | -               | -0.5            | 45.18     | Yes                         |
|               |                    | P24  | 3084677        | 3084707      | Upstream |                              |                 | 101             | 26.52     |                             |
| 17            | <i>uspA/uspB</i>   | P25  | 3637850        | 3637894      | Upstream | N                            | -               | -135/-3         | 4.82      | Yes                         |
| 18            | <i>yhiS_1</i>      | P26  | 3649418        | 3649455      | Internal | N                            | -               | -               | 32.10     | -                           |

|    |                  |     |         |         |          |   |     |        |        |     |
|----|------------------|-----|---------|---------|----------|---|-----|--------|--------|-----|
|    |                  | P27 | 3651832 | 3651858 | Upstream |   |     | -114   | 145.28 |     |
|    |                  | P28 | 3651850 | 3651872 | Upstream |   |     | -98    | 178.00 |     |
| 19 | <i>slp-dctR</i>  | P29 | 3651863 | 3651894 | Upstream | Y | Act | -80.5  | 151.59 | Yes |
|    |                  | P30 | 3651946 | 3651966 | Upstream |   |     | -3     | 179.26 |     |
|    |                  | P31 | 3651968 | 3651984 | Upstream |   |     | 17     | 192.68 |     |
|    |                  | P32 | 3655735 | 3655770 | Upstream |   |     | -70.5  | 66.35  |     |
| 20 | <i>gadE</i>      | P33 | 3655754 | 3655785 | Upstream | N | -   | -53.5  | 54.04  | Yes |
|    |                  | P34 | 3655775 | 3655798 | Upstream |   |     | -36.5  | 40.39  |     |
|    |                  | P35 | 3655811 | 3655842 | Upstream |   |     | 3.5    | 79.18  |     |
|    |                  | P36 | 3662816 | 3662836 | Upstream |   |     | -22    | 118.48 |     |
| 21 | <i>gadW</i>      | P37 | 3662857 | 3662888 | Upstream | Y | Rep | -68.5  | 174.99 | Yes |
|    |                  | P38 | 3662883 | 3662918 | Upstream |   |     | -96.5  | 337.74 |     |
| 22 | <i>gadA</i>      | P39 | 3665727 | 3665747 | Upstream | N | -   | -106   | 11.37  | Yes |
|    |                  | P40 | 3665749 | 3665768 | Upstream |   |     | -127.5 | 14.58  |     |
| 23 | <i>yiiS-uspD</i> | P41 | 4110801 | 4110821 | Upstream | N | -   | 71     | 43.24  | No  |

<sup>a</sup> Red characters indicate novel RpoS bindings.

Supplementary Table 4. Confirmation of previously characterized GadEWX-binding sites

| Number      | Transcription Unit | Decision   |
|-------------|--------------------|------------|
| <b>GadE</b> |                    |            |
| 1           | <i>gadBC</i>       | Yes        |
| 2           | <i>rcaA</i>        | No         |
| 3           | <i>gltBD</i>       | Yes        |
| 4           | <i>hdeAB-yhiD</i>  | Yes        |
| 5           | <i>hdeD</i>        | Yes        |
| 6           | <i>gadE</i>        | Yes        |
| 7           | <i>gadX</i>        | No         |
| <b>GadW</b> |                    |            |
| 1           | <i>gadBC</i>       | No         |
| 2           | <i>hdeAB-yhiD</i>  | No         |
| 3           | <i>gadA</i>        | No         |
| <b>GadX</b> |                    |            |
| 1           | <i>gadBC</i>       | Yes        |
| 2           | <i>slp-dctR</i>    | Yes        |
| 3           | <i>hdeAB-yhiD</i>  | No         |
| 4           | <i>hdeD</i>        | No         |
| 5           | <i>gadA</i>        | Yes        |
| 6           | <i>btuB</i>        | No         |
| Total       |                    | 8/16 (50%) |

**Supplementary Table 5. Other transcription factors known to regulate genes in the GadEWX regulons (45 genes).**

| <b>TFs</b> | <b># of binding sites</b> | <b>Target genes</b>                                |
|------------|---------------------------|----------------------------------------------------|
| H-NS       | 9                         | <i>yhiD/gadE/slp/gadA/hdeD/hdeB/hdeA/yhiM/dctR</i> |
| FliZ       | 6                         | <i>yhiD/gadE/gadB/gadC/hdeB/hdeA</i>               |
| CRP        | 6                         | <i>gcvP/gadE/gcvT/gcvH/gltB/gltD</i>               |
| Lrp        | 6                         | <i>gcvP/gcvT/gcvH/micF/gltB/gltD</i>               |
| AdiY       | 5                         | <i>gadC/gltB/gltD/gadB/gadA</i>                    |
| PhoP       | 4                         | <i>yhiD/hdeD/hdeB/hdeA</i>                         |
| MarA       | 4                         | <i>yhiD/micF/hdeB/hdeA</i>                         |
| IHF        | 3                         | <i>micF/gltB/gltD</i>                              |
| GcvA       | 3                         | <i>gcvH/gcvP/gcvT</i>                              |
| OmpR       | 2                         | <i>micF/dtpA</i>                                   |
| HdfR       | 2                         | <i>gltB/gltD</i>                                   |
| ArgR       | 2                         | <i>gltB/gltD</i>                                   |
| FadR       | 1                         | <i>uspA</i>                                        |
| Rob        | 1                         | <i>micF</i>                                        |
| SoxS       | 1                         | <i>micF</i>                                        |
| NhaR       | 1                         | <i>nhaR</i>                                        |
| ArcA       | 1                         | <i>gadE</i>                                        |
| EvgA       | 1                         | <i>gadE</i>                                        |
| RcsB       | 1                         | <i>gadA</i>                                        |
| RcdA       | 1                         | <i>asr</i>                                         |
| RstA       | 1                         | <i>asr</i>                                         |
| YdeO       | 1                         | <i>gadE</i>                                        |
